# Supplementary material
Source: publisher figshare collection journal article supplement (https://becaris.figshare.com/articles/dataset/_/25304110)
Supplement: Supplementary file [file 1]

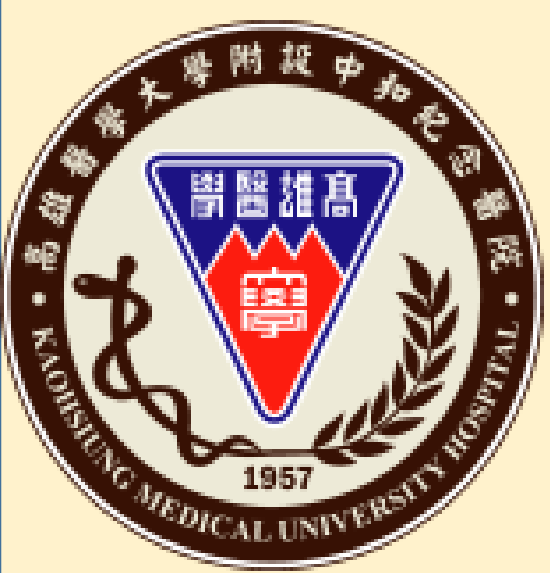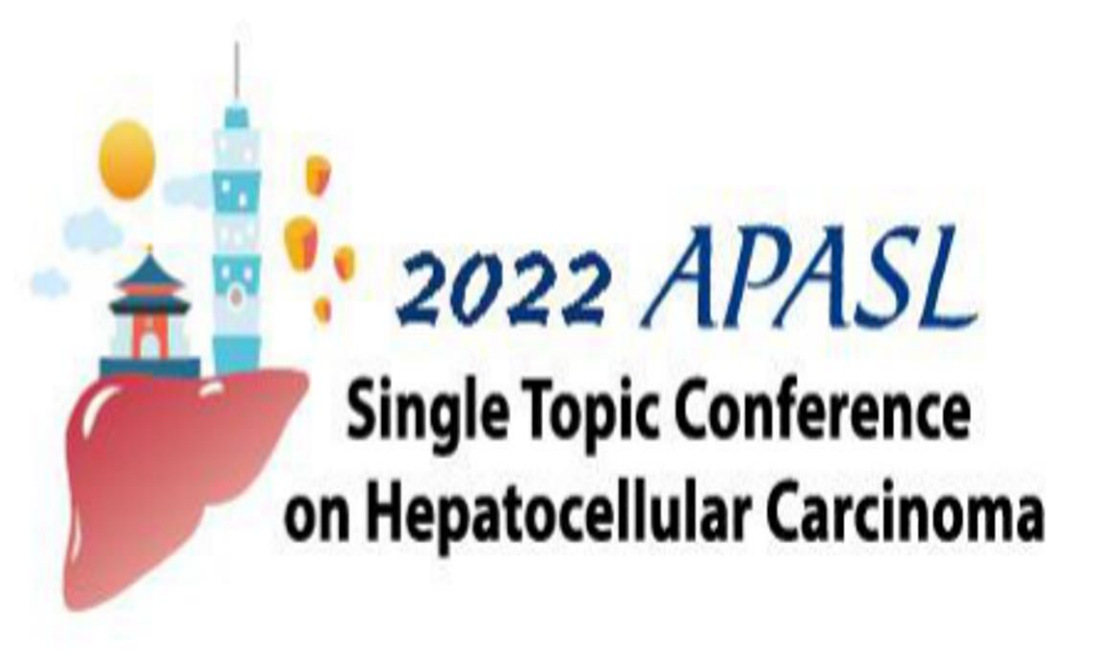

# The clinical utility of Elecsys GAAD score in the diagnosis of hepatocellular carcinoma

Chung-Feng Huang<sup>1</sup>, Ashish Sharma<sup>2</sup>, Ming-Lung Yu<sup>1</sup>

<sup>1</sup>Hepatobiliary Division, Department of Internal Medicine, Kaohsiung Medical University Hospital, Kaohsiung Medical University, Kaohsiung, Taiwan

<sup>2</sup>Clinical Development and Medical Affairs, Roche Diagnostics International AG, Rotkreuz, Switzerland

## Background

Regional guidelines have suggested sonography with or without adding serum tumor markers as the standard of hepatocellular carcinoma (HCC) surveillance. The performance of Elecsys® GAAD score, which includes the parameters of gender, age, alpha-fetoprotein (AFP) and protein induced by Vitamin K absence or antagonists-II (PIVKA-II) in the diagnosis of HCC is elusive.

## Aims

The current study aims to address the diagnostic accuracy of HCC using Elecsys GAAD algorithmic score as compared to AFP and PIVKA-II with or without the complementation of sonography.

## Methods

A total of 430 subjects including 200 healthy controls, 117 non-cirrhotic patients with chronic liver disease (chronic hepatitis B [CHB, n=67] and chronic hepatitis C [CHC, n=50]), 60 cirrhotic patients ([CHB, n=11] and [CHC, n=49]) and 53 HCC ([CHB, n=33], [CHC, n=19] and [non CHB/CHC, n=1]) were enrolled. Sonography was performed every 6 months in patients with liver disease. Blood sampling was collected within 3 months before HCC diagnosis in the 53 HCC patients.

## Results

Of the 53 HCC patients, the distribution of Barcelona Clinic Liver Cancer (BCLC) classification was BCLC 0 (n=7, 13.2%), BCLC A (n=19, 35.8%), BCLC B (n=12, 22.6%) and BCLC C (n=15, 28.3%), respectively. By adopting the clinically validated Elecsys GAAD cut-off value of 2.57, the sensitivity of AFP, PIVKA-II and GAAD in the diagnosis of HCC was 43.4%, 69.8% and 77.4%, respectively, whereas the area under ROC (AUROC) was 0.79, 0.92 and 0.92, respectively. Notably, GAAD has a substantially better sensitivity than PIVKA-II in HCC patients with very early stage (BCLC 0, 57.1% vs. 26.6%). While comparing the different performances between PIVKA-II and GAAD among the 26 patients with early HCC (BCLC 0-A), there was only one patient who had elevated PIVKA-II but with a normal GAAD score. By contrast, 4 early HCC patients had normal PIVKA-II but presented with abnormal GAAD scores. By the complementation of sonography, the sensitivity of GAAD was 92.5%, and reached up to 100% in the subgroups of BCLC C, non-cirrhotic as well as CHC patients.

## Conclusions

PIVKA-II and GAAD are more sensitive than AFP in HCC diagnosis. Elecsys GAAD score is highly accurate in the diagnosis of HCC, which may outperform PIVKA-II in particular in patients with early HCC. The complementation with sonography further added value for HCC diagnosis.

|                                                  | Healthy control<br>(n=200) | CHC/non-LC<br>(n=50) | CHB/non-LC<br>(n=67) | CHC/LC<br>(n=49) | CHB/LC<br>(n=11) | HCC*<br>(n=53)     |
|--------------------------------------------------|----------------------------|----------------------|----------------------|------------------|------------------|--------------------|
| Male gender, n (%)                               | 53 (26.5)                  | 25 (50.0)            | 45 (67.2)            | 23 (46.9)        | 7 (63.6)         | 40 (75.5)          |
| Age, yrs (mean±SD)                               | 54.4±15.9                  | 58.4±13.1            | 56.0±13.0            | 66.4±11.2        | 58.7±9.0         | 64.1±9.9           |
| Platelet count, x1000 /mm <sup>3</sup> (mean±SD) | 263±64                     | 198±59               | 207±90               | 144±66           | 115±49           | 192±94             |
| AST, IU/L (mean±SD)                              | 20±5                       | 51±32                | 255±527              | 54±35            | 1007±926         | 66.8±77.2          |
| ALT, IU/L (mean±SD)                              | 18±7                       | 70±51                | 372±965              | 55±46            | 1201±992         | 48.7±62.1          |
| AFP, ng/ ml, (mean±SD)                           | 2.8±1.7                    | 4.3±3.8              | 6.3±10.0             | 5.1±5.5          | 15.6±23.0        | 2808±10788         |
| AFP, ng/ ml, (median, range)                     | 2.4 (0.6-13.8)             | 3.1 (0.6-19.0)       | 3.0 (0.8-56.1)       | 3.4 (0.6-25.5)   | 7.5 (1.3-79.4)   | 10.2 (1.5-60138)   |
| PIVKA-II, ng/mL, (mean±SD)                       | 16.6±2.8                   | 16.9±4.7             | 21.8±38.8            | 31.9±50.2        | 34.1±70.1        | 898±2077           |
| PIVKA-II, ng/mL (median, range)                  | 16.5 (10.3-33.2)           | 15.9 (11.5-41.4)     | 15.6 (3.8-316.9)     | 16.9 (10-319.6)  | 14.3 (7.4-245.4) | 108.4 (13.2-10108) |
| GAAD score (mean±SD)                             | 0.45±0.59                  | 0.79±0.72            | 0.97±1.30            | 1.50±1.74        | 1.78±1.83        | 6.06±3.71          |
| GAAD score (median, range)                       | 0.23 (0.01-3.41)           | 0.59 (0.03-3.3)      | 0.47 (0.05-6.33)     | 0.97 (0.11-8.34) | 0.90 (0.11-4.79) | 6.6 (0.14-10.0)    |

Note: CHC: chronic hepatitis C. CHB: chronic hepatitis B. LC: liver cirrhosis. HCC\*: henatocellular carcinoma. AFP: aloha fetoprotein. PIVKA-II: Protein induced by Vitamin K absence or antagonists-II. SD: standard deviation. \*blood testing within 6 months before HCC occurrence

## Sensitivity of the biomarkers and US

Cutoff value: AFP-20 ng/mL, PIVKA-II 28.4 ng/mL, GAAD 2.57

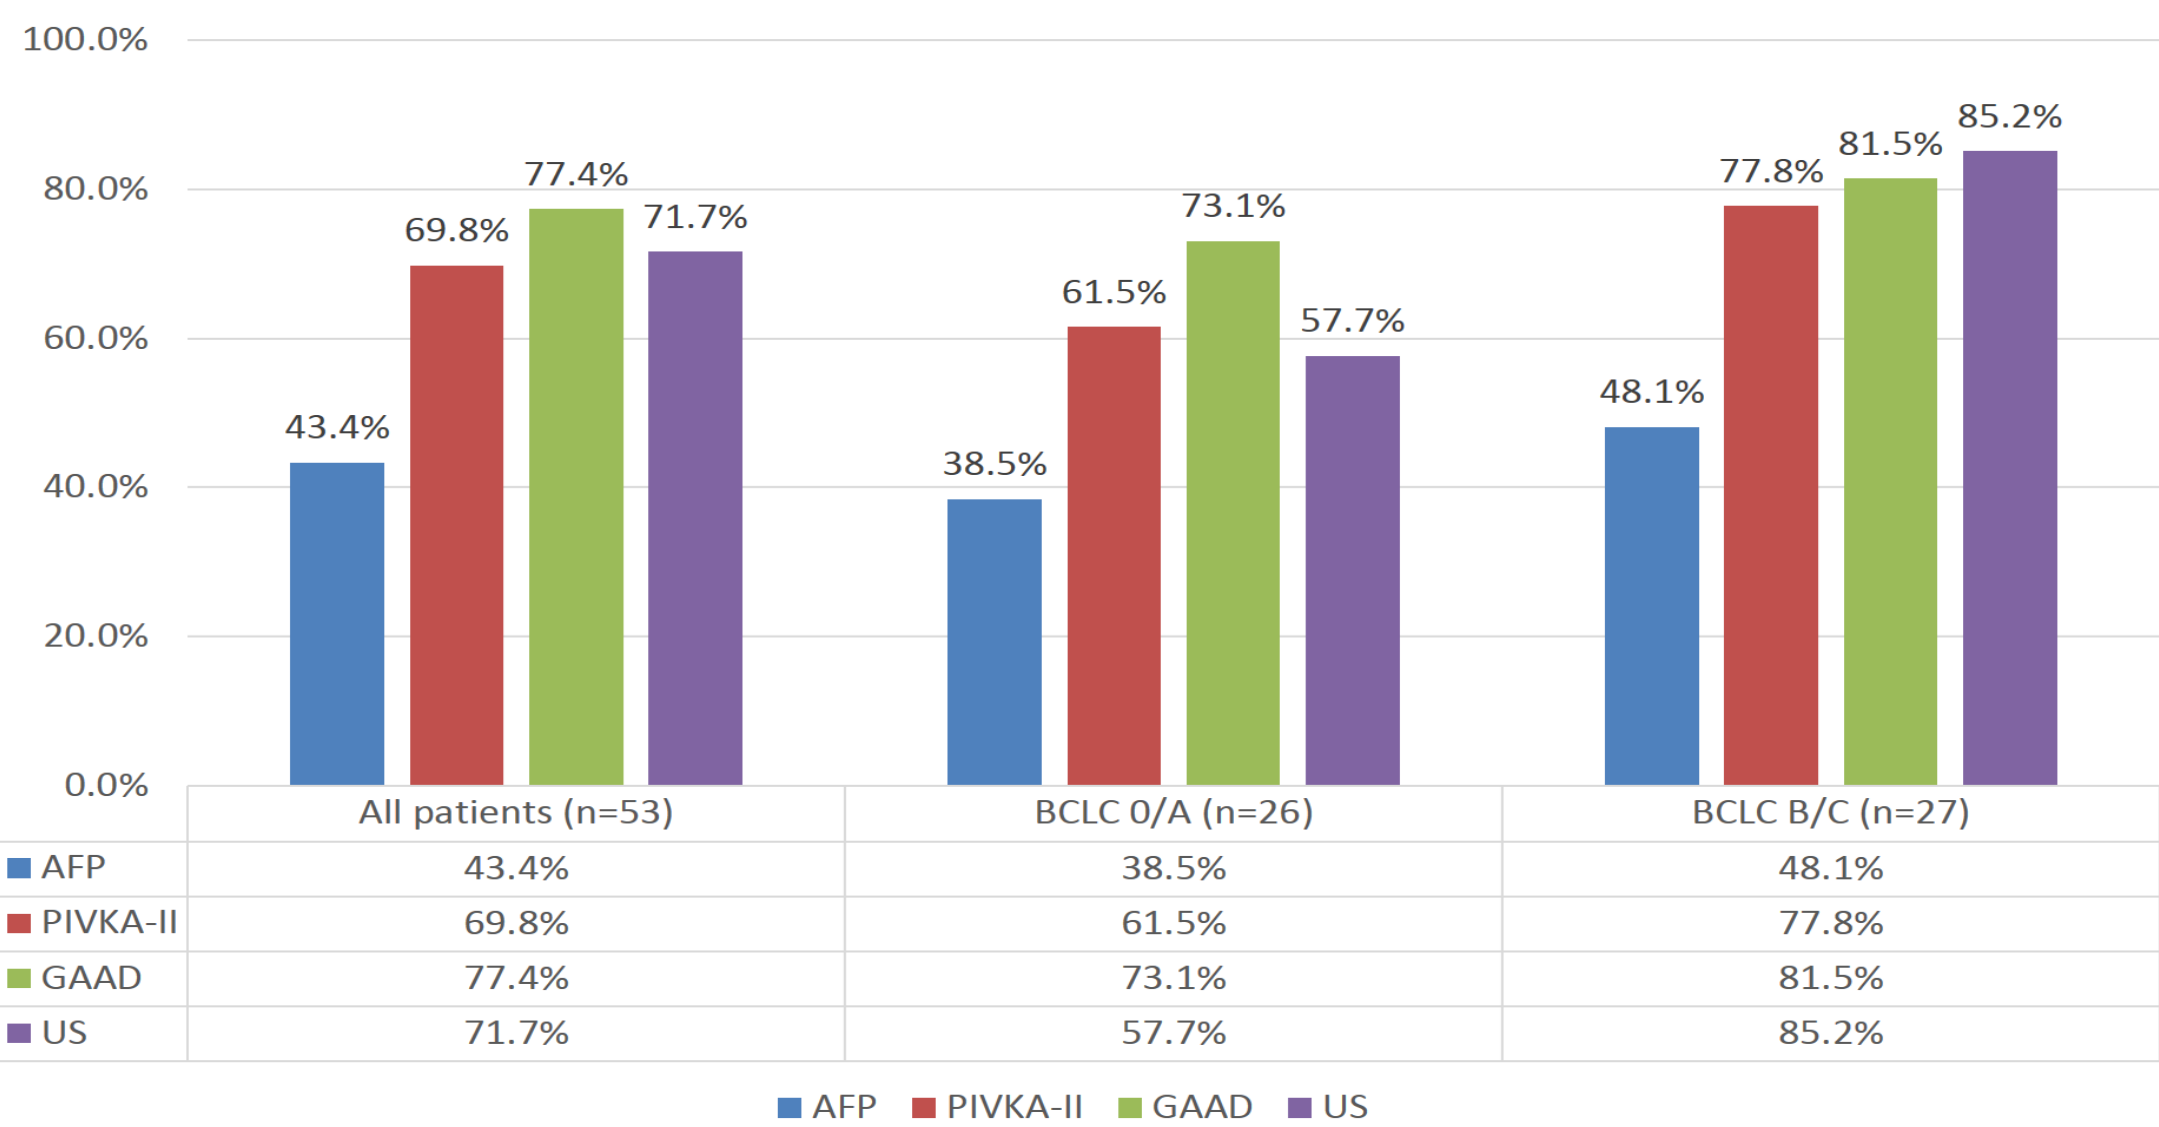

### Characteristics of the 53 HCC patients

|                                                  |            |
|--------------------------------------------------|------------|
| Male gender, n (%)                               | 40 (75.5)  |
| Age, yrs (mean±SD)                               | 64.1±9.9   |
| Body mass index, kg/m <sup>2</sup> (mean±SD)     | 25.2±3.5   |
| Platelet count, x1000 /mm <sup>3</sup> (mean±SD) | 192±94     |
| AST, IU/L (mean±SD)                              | 66.8±77.2  |
| ALT, IU/L (mean±SD)                              | 48.7±62.1  |
| Total bilirubin, mg/dL (mean±SD)                 | 1.10±0.70  |
| Liver cirrhosis, n (%)                           | 32 (60.4)  |
| Child-Pugh A, n (%)                              | 25 (47.2)  |
| Child-Pugh B, n (%)                              | 7 (13.2)   |
| Etiology                                         |            |
| HBV, n (%)                                       | 33 (62.3)  |
| HCV, n (%)                                       | 19 (35.8)  |
| NBNC, n (%)                                      | 1 (1.9)    |
| BCLC stage                                       |            |
| BCBC 0, n (%)                                    | 7 (13.2)   |
| BCLC A, n (%)                                    | 19 (35.8)  |
| BCLC B, n (%)                                    | 12 (22.6)  |
| BCLC C, n (%)                                    | 15 (28.3)  |
| Largest tumor size, cm (mean±SD)                 | 5.0±3.6    |
| AFP, ng/ ml, (mean±SD)                           | 2808±10788 |
| AFP> 20 ng/mL, n (%)                             | 23 (43.4)  |
| PIVKA-II, ng/mL, (mean±SD)                       | 898±2077   |
| PIVKA> 28.4 ng/mL, n (%)                         | 37 (69.8)  |
| GAAD score, (mean±SD)                            | 6.06±3.71  |
| GAAD score >2.57, n (%)                          | 41 (77.4)  |

### AUROC

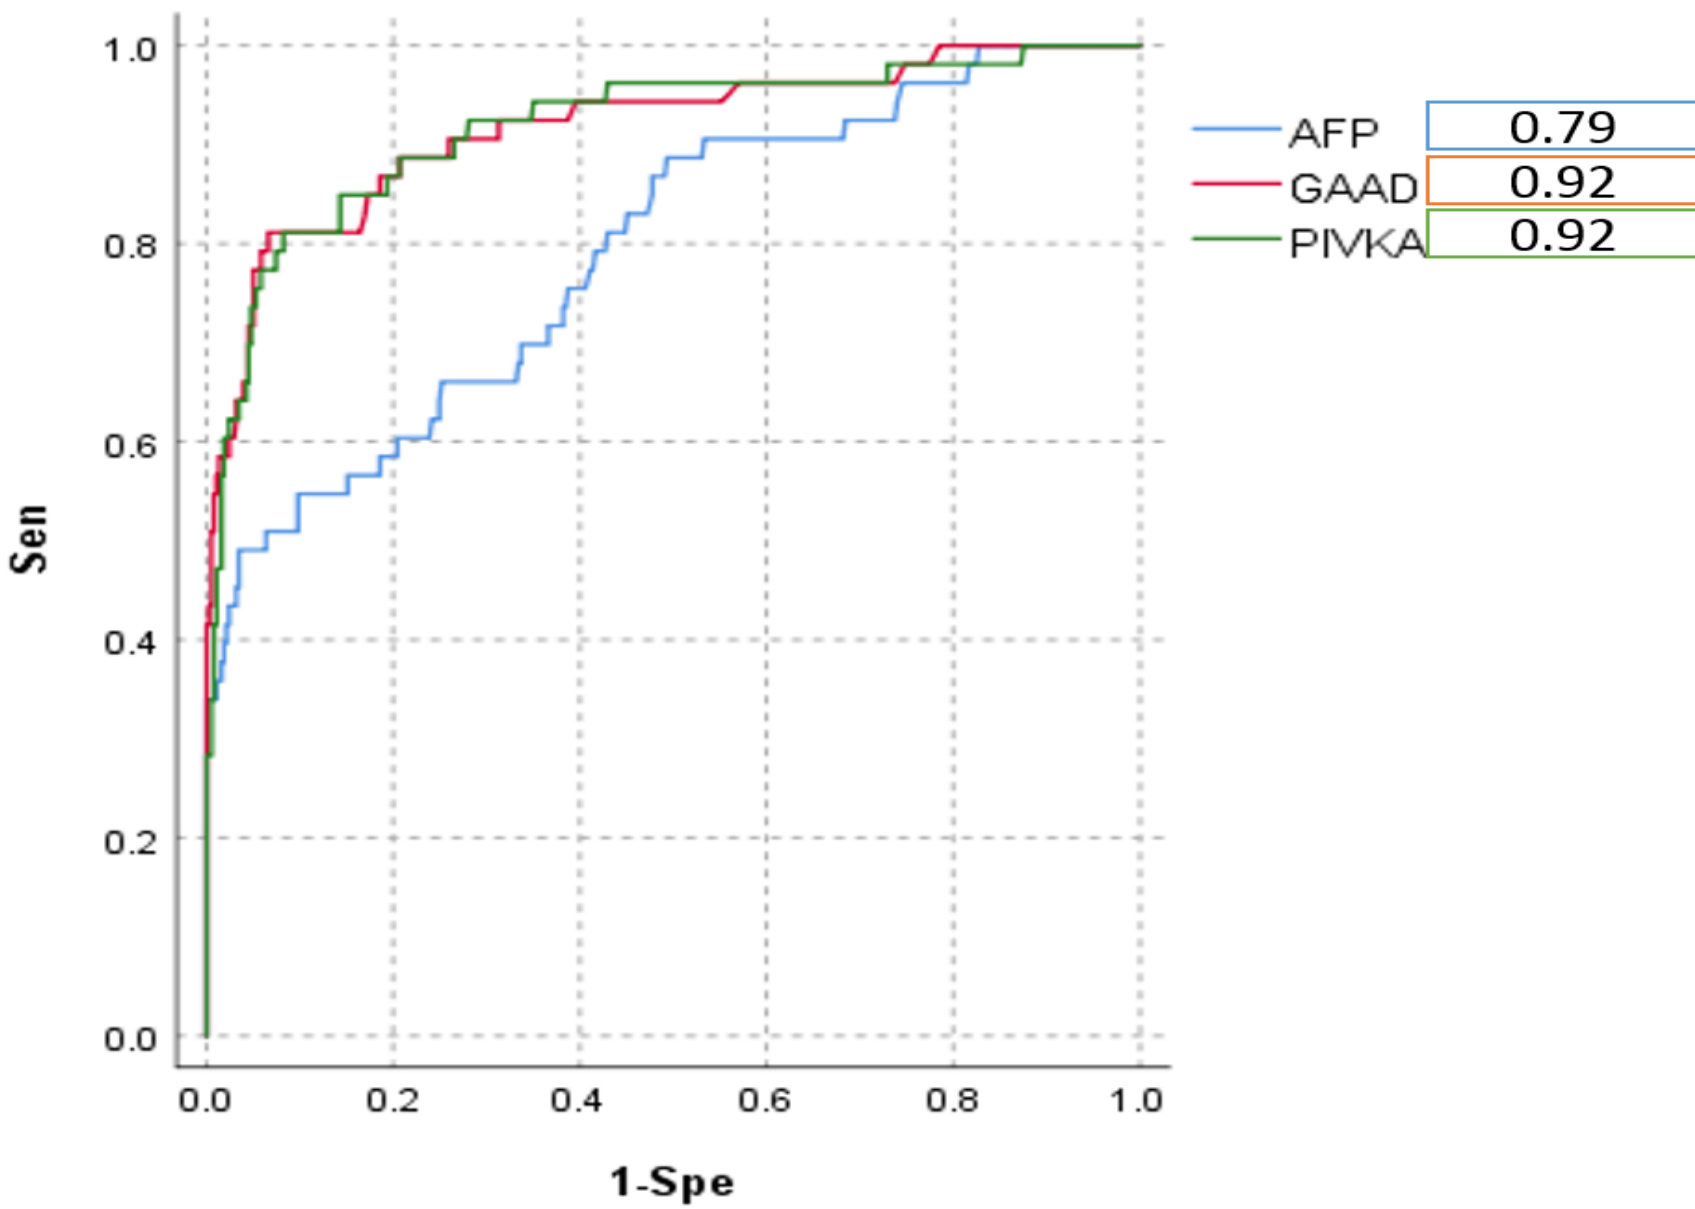

Cutoff value: AFP-20 ng/mL, PIVKA-II 28.4 ng/mL, GAAD 2.57

## GAAD adds SEN to US in detecting early HCC

|        |      |      |
|--------|------|------|
| BCLC 0 | US + | US - |
| GAAD > | 0    | 4    |
| GAAD ≤ | 2    | 1    |
| BCLC A | US + | US - |
| GAAD > | 11   | 4    |
| GAAD ≤ | 2    | 2    |
| BCLC B | US + | US - |
| GAAD > | 8    | 1    |
| GAAD ≤ | 2    | 1    |
| BCLC C | US + | US - |
| GAAD > | 11   | 2    |
| GAAD ≤ | 2    | 0    |

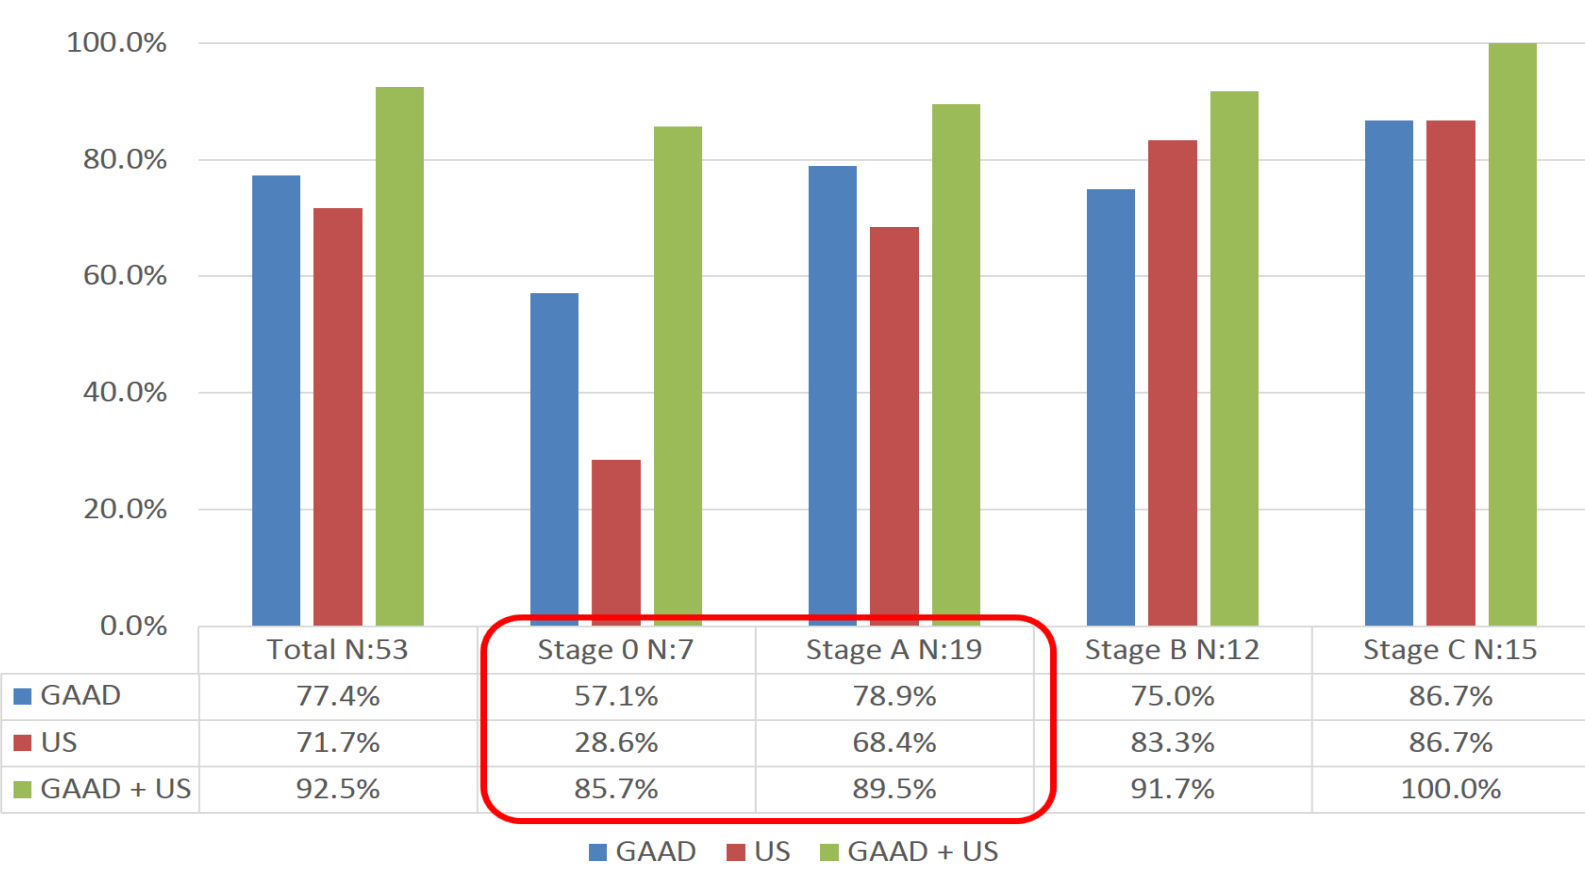

### Comparison of GAAD and other markers and US in HCC patients

GAAD score serves a complementary tool with sonography in the diagnosis of HCC

| US+GAAD sensitivity = 92.5% |        |  |      |  |       |  |        |  |            |  |            |  |
|-----------------------------|--------|--|------|--|-------|--|--------|--|------------|--|------------|--|
| All stage<br>N=53           | US +   |  | US - |  | AFP > |  | AFP ≤  |  | PIVKA-II > |  | PIVKA-II ≤ |  |
|                             | GAAD > |  | 30   |  | 11    |  | GAAD > |  | 22         |  | 19         |  |
|                             | GAAD > |  | 34   |  | 7     |  | GAAD > |  | 3          |  | 9          |  |
|                             | GAAD ≤ |  | 8    |  | 4     |  | GAAD ≤ |  | 1          |  | 11         |  |
| US+GAAD sensitivity = 88.5% |        |  |      |  |       |  |        |  |            |  |            |  |
| Early stage<br>N=26         | US +   |  | US - |  | AFP > |  | AFP ≤  |  | PIVKA-II > |  | PIVKA-II ≤ |  |
|                             | GAAD > |  | 11   |  | 8     |  | GAAD > |  | 9          |  | 10         |  |
|                             | GAAD > |  | 15   |  | 4     |  | GAAD > |  | 1          |  | 6          |  |
|                             | GAAD ≤ |  | 4    |  | 3     |  | GAAD ≤ |  | 1          |  | 6          |  |
| US+GAAD sensitivity = 96.3% |        |  |      |  |       |  |        |  |            |  |            |  |
| Late stage<br>N=27          | US +   |  | US - |  | AFP > |  | AFP ≤  |  | PIVKA-II > |  | PIVKA-II ≤ |  |
|                             | GAAD > |  | 19   |  | 3     |  | GAAD > |  | 13         |  | 9          |  |
|                             | GAAD > |  | 19   |  | 3     |  | GAAD > |  | 2          |  | 3          |  |
|                             | GAAD ≤ |  | 4    |  | 1     |  | GAAD ≤ |  | 0          |  | 5          |  |

## Sensitivity/Specificity stratified by cirrhotic status

|                                  | Non-HCC,<br>n (%) | HCC,<br>n (%) | AUROC | P value | SEN<br>(%) | SPE<br>(%) | PPV<br>(%) | NPV<br>(%) | ACC<br>(%) |
|----------------------------------|-------------------|---------------|-------|---------|------------|------------|------------|------------|------------|
| Non-LC                           |                   |               |       |         |            |            |            |            |            |
| AFP> 20 ng/ml                    | 5 (1.6)           | 6 (28.6)      | 0.78  | <0.001  | 28.6       | 98.4       | 54.5       | 95.4       | 94.1       |
| PIVKA-II> 28.4 ng/mL             | 6 (1.9)           | 14 (66.7)     | 0.94  | <0.001  | 66.7       | 98.1       | 70.0       | 97.8       | 96.1       |
| GAAD score >2.57                 | 10 (3.2)          | 15 (71.4)     | 0.87  | <0.001  | 71.4       | 96.8       | 60.0       | 98.1       | 95.2       |
| GAAD score >2.57 plus sonography | 10 (3.2)          | 21 (100)      |       | <0.001  | 100        | 96.8       | 67.7       | 100        | 97.0       |
| LC                               |                   |               |       |         |            |            |            |            |            |
| AFP> 20 ng/ml                    | 5 (8.3)           | 17 (53.1)     | 0.76  | <0.001  | 53.1       | 91.7       | 77.3       | 78.6       | 78.3       |
| PIVKA-II> 28.4 ng/mL             | 12 (20.0)         | 23 (71.9)     | 0.87  | <0.001  | 71.9       | 80.0       | 65.7       | 84.2       | 77.2       |
| GAAD score >2.57                 | 10 (16.7)         | 26 (81.3)     | 0.90  | <0.001  | 81.3       | 83.3       | 72.2       | 89.3       | 82.6       |
| GAAD score >2.57 plus sonography | 10 (16.7)         | 28 (87.5)     |       | <0.001  | 87.5       | 83.3       | 73.7       | 92.6       | 84.7       |

Note: HCC: hepatocellular carcinoma. AUROC: Area Under the Receiver Operating Characteristic curve. SEN: sensitivity. SPE, specificity. PPV: positive predictive value. NPV: neg predictive value. ACC: accuracy.  
\*Patient distribution in terms of BCLC stages (BCLC 0-A vs. BCLC B-C) was similar between cirrhosis and non-cirrhosis.

## Sensitivity/Specificity stratified by etiology

|                                  | Non-HCC,<br>n (%) | HCC,<br>n (%) | AUROC | P value | SEN<br>(%) | SPE<br>(%) | PPV<br>(%) | NPV<br>(%) | ACC<br>(%) |
|----------------------------------|-------------------|---------------|-------|---------|------------|------------|------------|------------|------------|
| HBV                              |                   |               |       |         |            |            |            |            |            |
| AFP> 20 ng/ml                    | 7 (9.0)           | 16 (48.5)     | 0.75  | <0.001  | 48.5       | 91.0       | 69.6       | 80.7       | 78.4       |
| PIVKA-II> 28.4 ng/mL             | 5 (6.4)           | 21 (63.6)     | 0.92  | <0.001  | 63.6       | 93.6       | 80.8       | 85.9       | 84.7       |
| GAAD score >2.57                 | 9 (11.5)          | 24 (72.7)     | 0.88  | <0.001  | 72.7       | 88.5       | 72.7       | 88.5       | 83.8       |
| GAAD score >2.57 plus sonography | 9 (11.5)          | 29 (87.9)     |       | <0.001  | 87.9       | 88.5       | 76.3       | 94.5       | 88.3       |
| HCV                              |                   |               |       |         |            |            |            |            |            |
| AFP> 20 ng/ml                    | 3 (3.0)           | 7 (36.8)      | 0.75  | <0.001  | 36.8       | 97.0       | 70.0       | 88.9       | 87.3       |
| PIVKA-II> 28.4 ng/mL             | 12 (12.1)         | 15 (78.9)     | 0.89  | <0.001  | 78.9       | 87.9       | 55.6       | 95.6       | 86.4       |
| GAAD score >2.57                 | 8 (8.1)           | 16 (84.2)     | 0.90  | <0.001  | 84.2       | 91.9       | 66.7       | 96.8       | 90.7       |
| GAAD score >2.57 plus sonography | 8 (8.1)           | 19 (100)      |       | <0.001  | 100        | 91.9       | 70.4       | 100        | 93.2       |

Note: HCC: hepatocellular carcinoma. AUROC: Area Under the Receiver Operating Characteristic curve. SEN: sensitivity. SPE, specificity. PPV: positive predictive value. NPV: negative predictive value. ACC: accuracy.  
\*Patient distribution in terms of BCLC stages (BCLC 0-A vs. BCLC B-C) was similar between viral etiology.
